# Supplementary material for: Surface group-modified MXene nano-flake doping of monolayer tungsten disulfides
Source: PubMed Central journal article supplement — Nanoscale Adv. 2019 Oct 16;1(12):4783–9. doi: 10.1039/c9na00395a (PMC9417804; doi:10.1039/c9na00395a), 2019-10-16
Supplement: NA-001-C9NA00395A-s001.pdf [file NA-001-C9NA00395A-s001.pdf]

**Surface Group Modified Mxene Nano-flakes doping of Tungsten Disulfide Monolayer**

Ye Tao, See Wee Koh, Xuechao Yu, Chongwu Wang, Houkun Liang, Ying Zhang,

Hong Li\* and Qi Jie Wang\*

Dr. Y. Tao, Dr. X. C. Yu, Dr. C. W. Wang, Prof. Q. J. Wang

Centre for OptoElectronics and Biophotonics, School of Electrical and Electronic

Engineering & The Photonics Institute, Nanyang Technological University, 50

Nanyang Avenue, 639798, Singapore

E-mail: qjwang@ntu.edu.sg

Mr. S. W. Koh, Prof. H. Li

School of Mechanical and Aerospace Engineering Road, , Nanyang Technological

University, 50 Nanyang Avenue, 639798, Singapore

E-mail: ehongli@ntu.edu.sg

Dr. H. K. Liang, Dr. Y. Zhang

Singapore Institute of Manufacturing Technology, 71 Nanyang Drive, 638075

Singapore

## 1. Characterization of Mxene

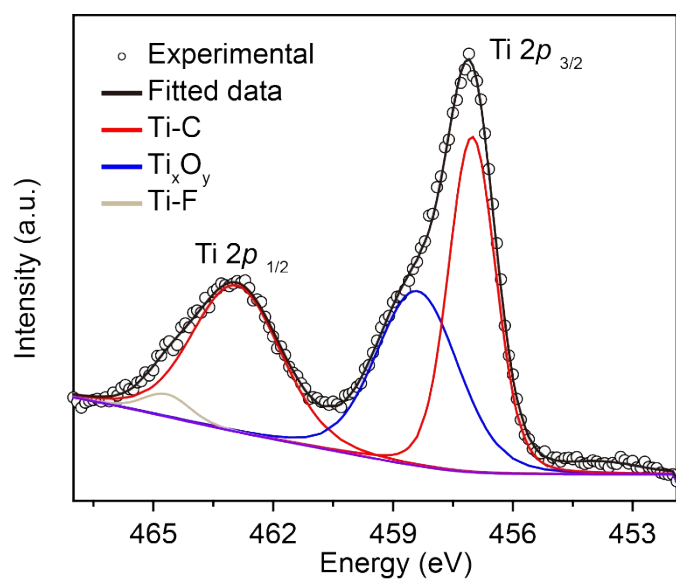

**Figure S1.** High-resolution X-ray photoelectron spectroscopy (XPS) spectra of F- $Ti_3C_2T_x$  nano-flakes in Ti 2p region and its corresponding deconvoluted components.

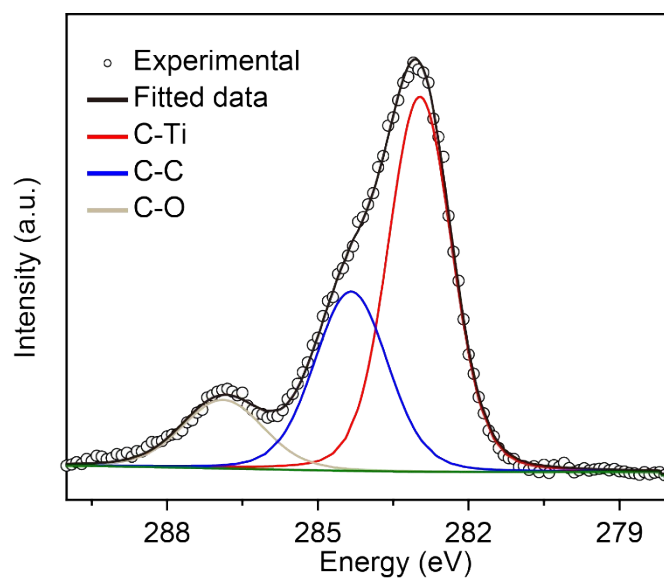

**Figure S2.** High-resolution X-ray photoelectron spectroscopy (XPS) spectra of F- $Ti_3C_2T_x$  nano-flakes in C 1s region and its corresponding deconvoluted components.

## 2. Characterization of monolayer WS<sub>2</sub>

The photoluminescence (PL) spectra of monolayer WS<sub>2</sub> on SiO<sub>2</sub>/Si substrate were conducted through a WITec alpha 300 R system with an excitation wavelength of 532 nm at room temperature. In order to avoid heating and optical doping effect, the power of laser was kept as low as 10  $\mu$ W for the room temperature PL measurement.

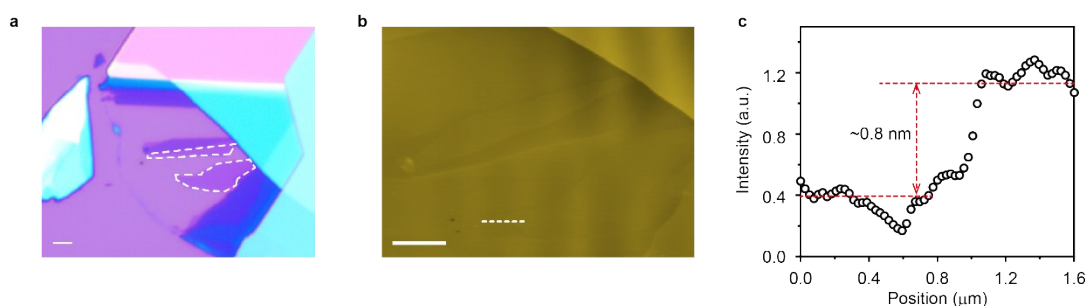

**Figure S3.** (a) Optical image, (b) AFM image of a WS<sub>2</sub> flake on SiO<sub>2</sub>/Si substrate measured at room temperature. (d) The AFM height measured along the dotted line in (b). The scale bar in (a) and (b) is 2  $\mu$ m, respectively.

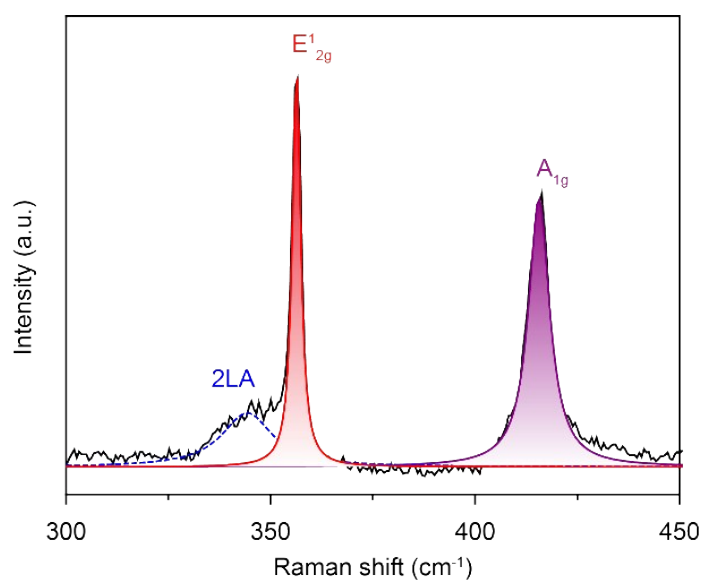

**Figure S4.** Raman spectrum of a WS<sub>2</sub> flake on SiO<sub>2</sub>/Si substrate measured at room temperature.

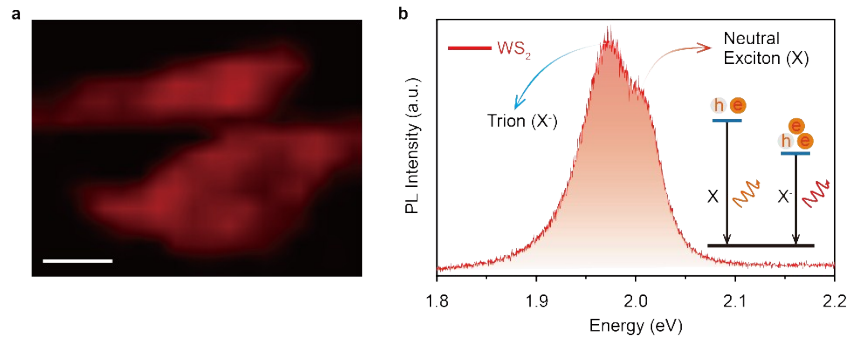

**Figure S5.** (a) PL mapping and (b) the corresponding PL spectrum of monolayer WS<sub>2</sub> excited by 523 nm laser. Inset: schematic drawing of the neutral exciton (X) and negative trion (X<sup>-</sup>). The scale bar in (a) is 2 μm.

**Table S1.** A brief summary of the PL enhancement in atomically thin transition metal dichalcogenides (TMDCs).<sup>[1-6]</sup>

| TMDCs            | Dopant          | PL enhancement factor <sup>a</sup> | References |
|------------------|-----------------|------------------------------------|------------|
| WS <sub>2</sub>  | F4TCNQ          | ~2.3                               | S1         |
| WS <sub>2</sub>  | fluorine plasma | ~4.2                               | S2         |
| WS <sub>2</sub>  | choline plasma  | ~3.0                               | S3         |
| MoS <sub>2</sub> | F4TCNQ          | ~3.2                               | S4         |
| MoS <sub>2</sub> | TCNQ            | ~2.9                               | S4         |
| MoS <sub>2</sub> | graphene        | ~2.0                               | S5         |
| MoS <sub>2</sub> | gate voltage    | ~2.8                               | S6         |
| WS <sub>2</sub>  | HATCN           | ~10                                | S7         |
| WS <sub>2</sub>  | Mxene           | ~5                                 | This work  |

<sup>a</sup>The PL enhancement factor is defined as the ratio of the final integrated intensity of modified TMDCs to the integrated intensity of pristine TMDCs.

## References:

- [S1] N. Peimyoo, W. Yang, J. Shang, X. Shen, Y. Wang, T. Yu, *ACS Nano* **2014**, 8, 11320-11329.
- [S2] Y. I. Jhon, Y. Kim, J. Park, J. H. Kim, T. Lee, M. Seo, Y. M. Jhon, *Adv. Funct. Mater.* **2016**, 26, 7551-7559.
- [S3] Y. Kim, Y. I. Jhon, J. Park, C. Kim, S. Lee, Y. M. Jhon, *Sci. Rep.* **2016**, 6, 21405.
- [S4] S. Mouri, Y. Miyauchi, K. Matsuda, *Nano Lett.* **2013**, 13, 5944-5948.
- [S5] C. E. Giusca, I. Rungger, V. Panchal, C. Melios, Z. Lin, Y. Lin, E. Kahn, A. L. Elías, J. A. Robinson, M. Terrones, O. Kazakova, *ACS Nano* **2016**, 10, 7840-7846.
- [S6] K. F. Mak, K. He, C. Lee, G. H. Lee, J. Hone, T. F. Heinz, J. Shan, *Nat. Mater.* **2012**, 12, 207-211.
- [S7] Y. Tao, X. Yu, J. Li, H. Liang, Y. Zhang, W. Huang, Q. J. Wang, *Nanoscale* **2018**, 10, 6294.
